# Supplementary figures and images for: Soluble vascular endothelial growth factor receptor 2 and prognosis in patients with chronic heart failure
Source: PubMed Central journal article supplement — ESC Heart Fail. 2021 Aug 13;8(5):4187–98. doi: 10.1002/ehf2.13555 (PMC8497334; doi:10.1002/ehf2.13555), 2021-08-13

# S-Figure 1

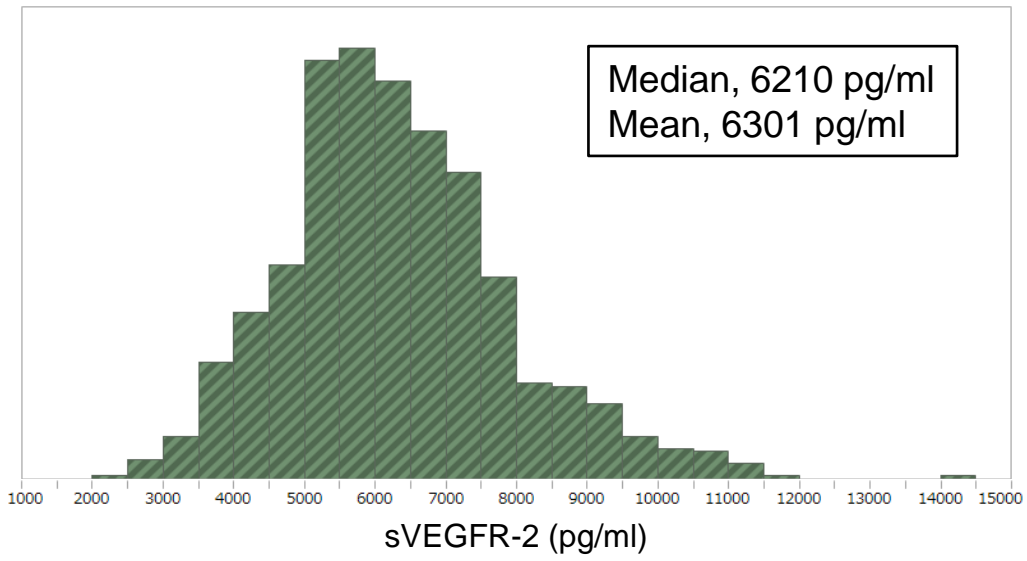

# S-Figure 2

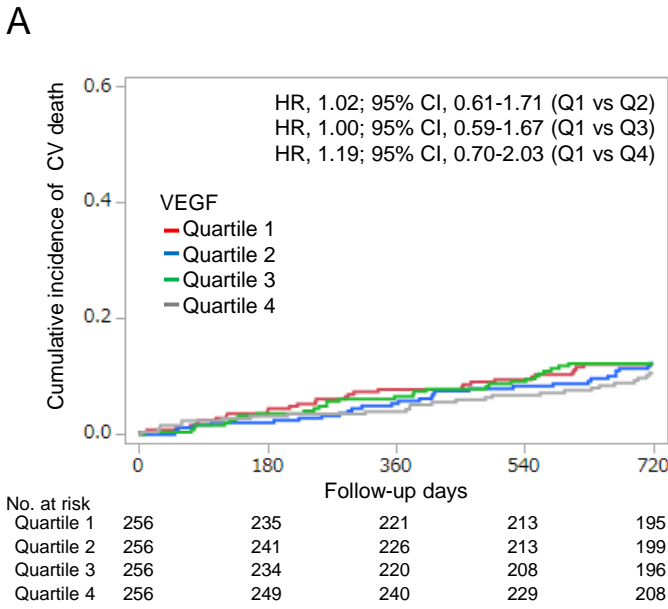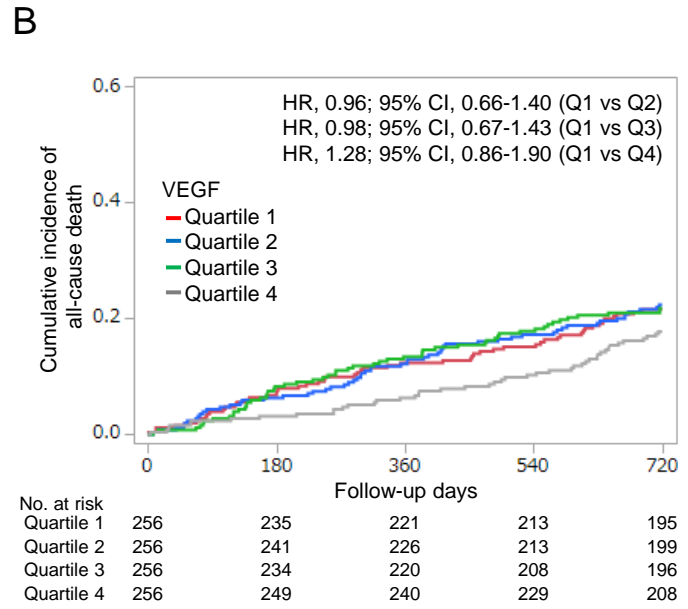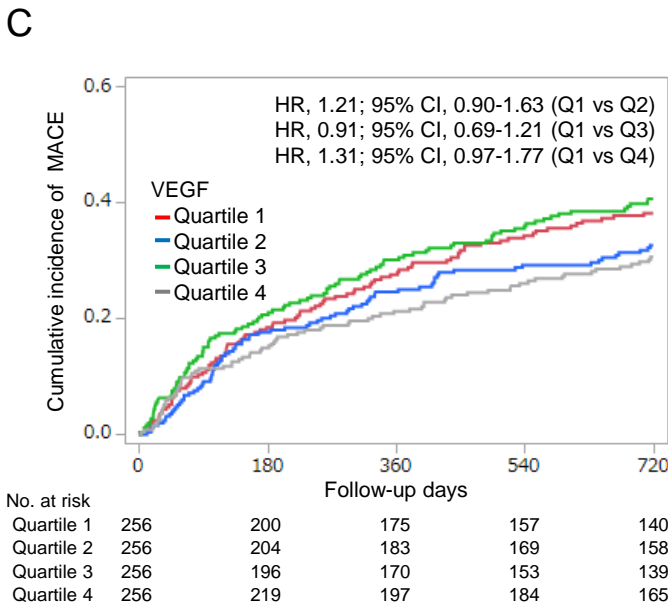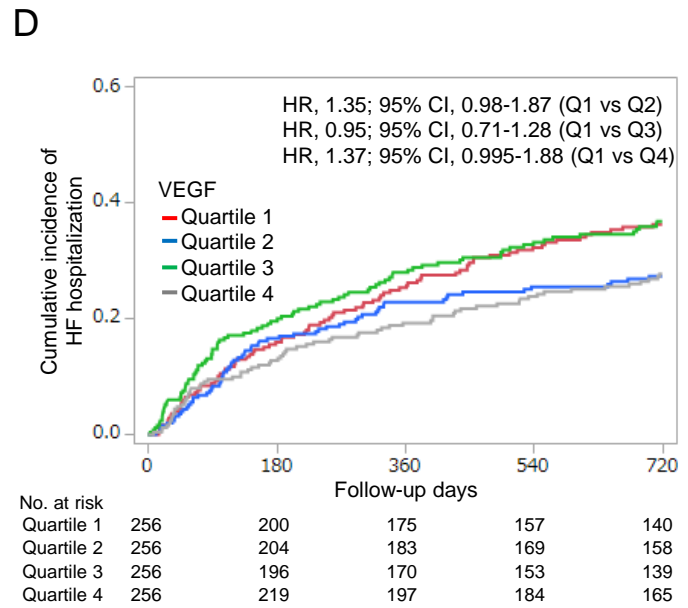

# S-Figure 3

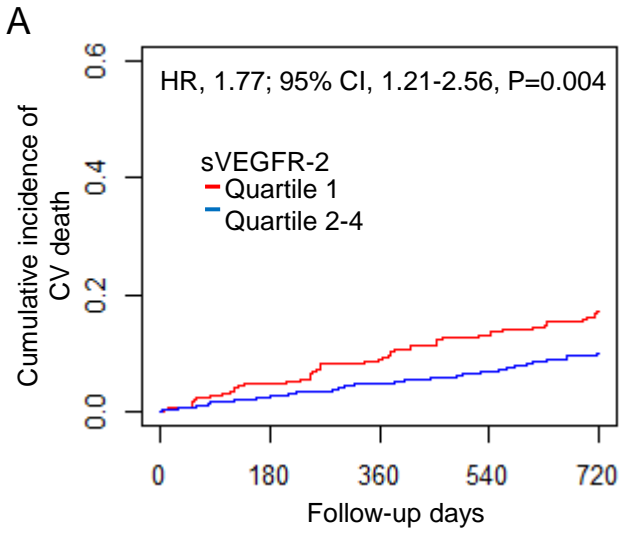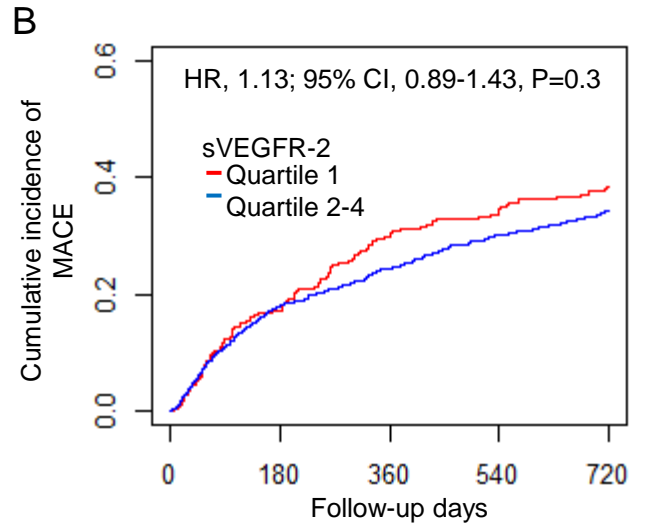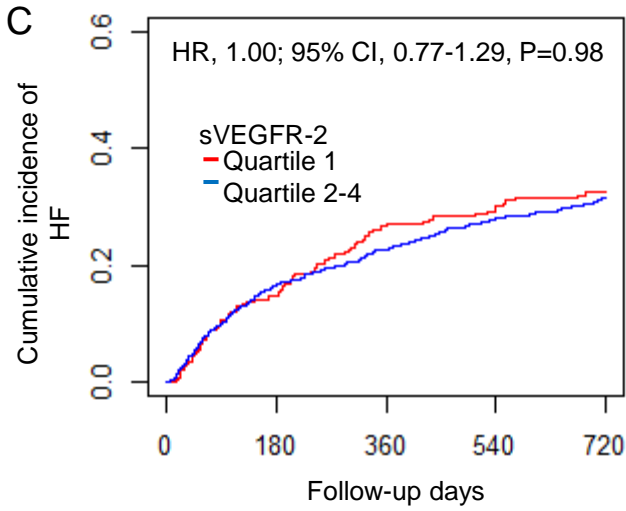

# S-Figure 4

A

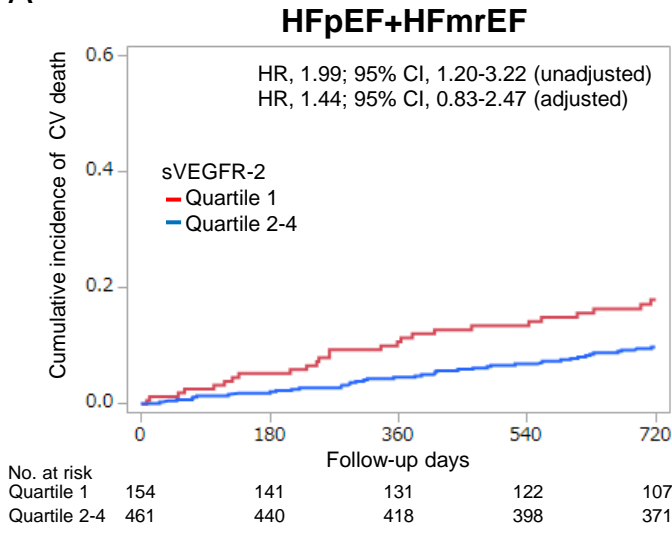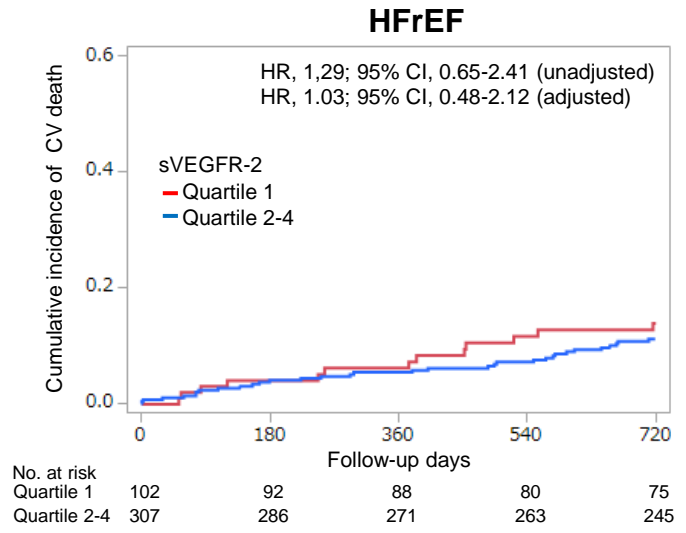

B

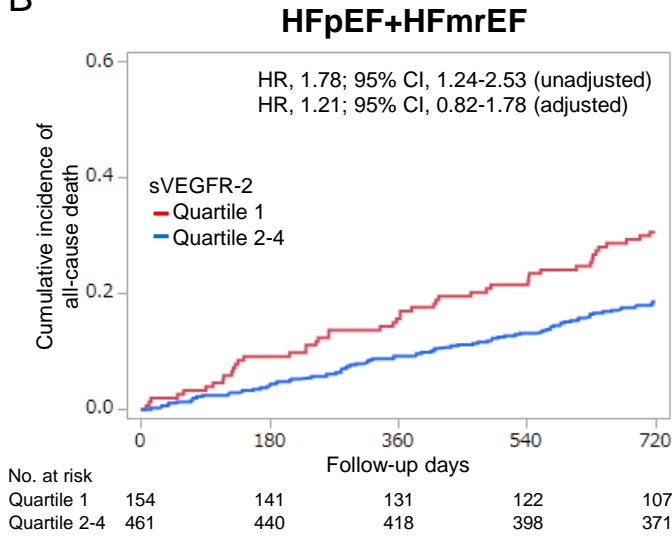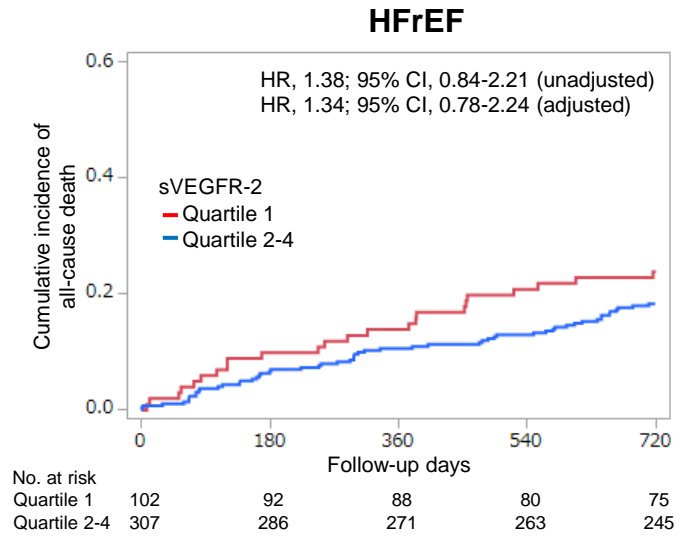

# S-Figure 5

A

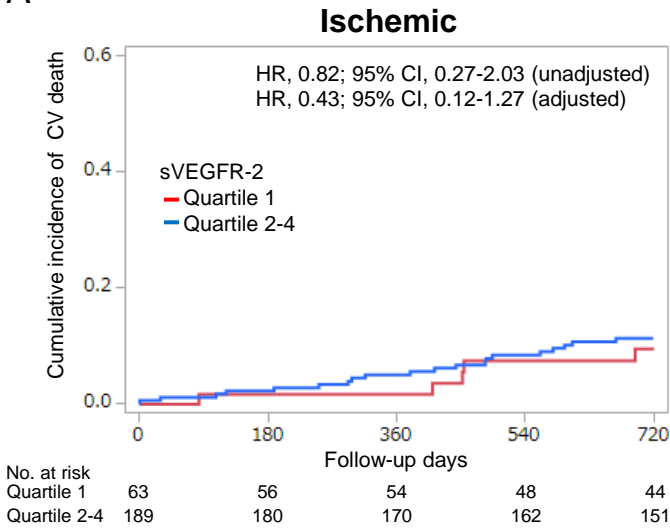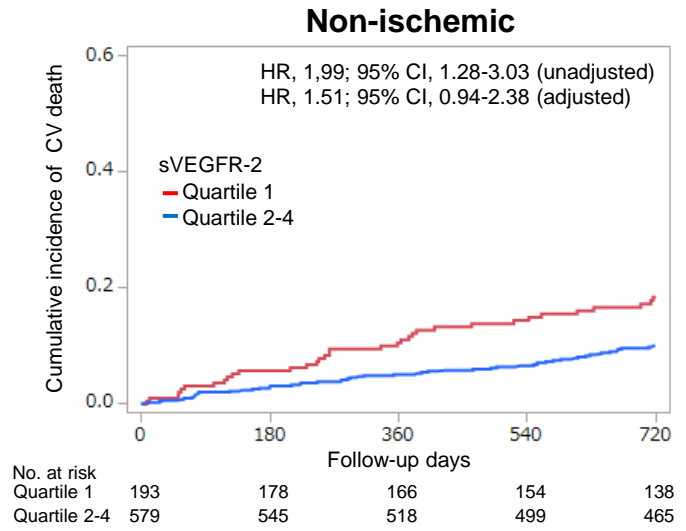

B

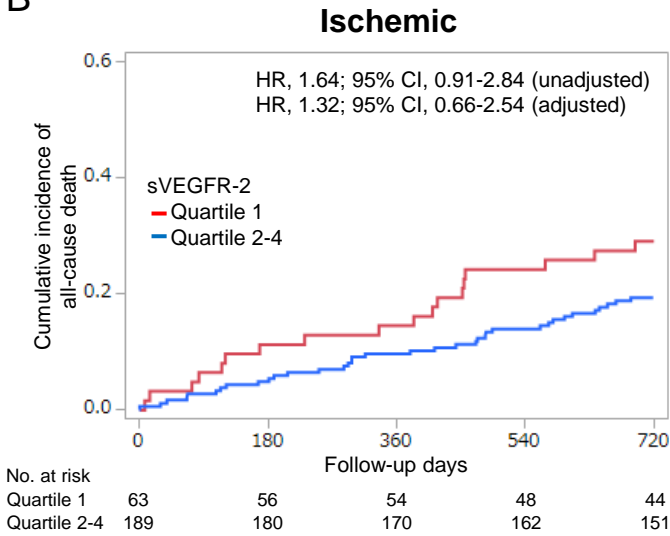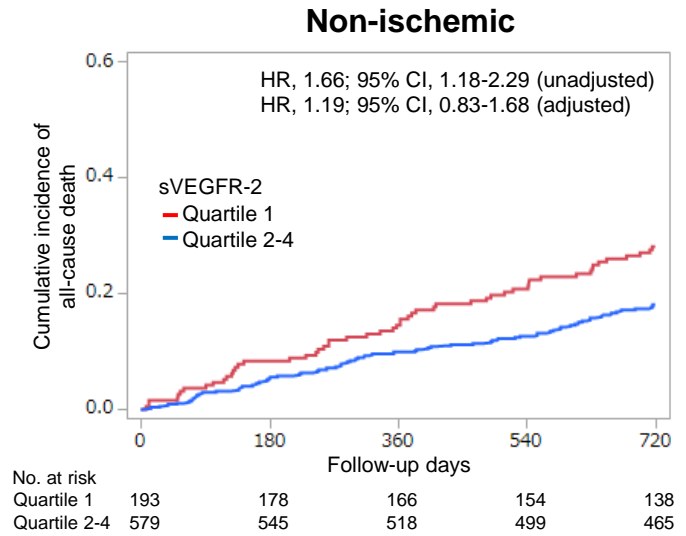

Supplement: EHF2-8-4187-s001.pdf [file EHF2-8-4187-s001.pdf]
